# Supplementary material for: Chain length, temperature and solvent effects on the structural properties of α-aminoisobutyric acid homooligopeptides
Source: Royal Society of Chemistry journal article supplement (doi:10.1039/c6cp01120a), 2016-01-01
Supplement: c6cp01120a1.pdf [file c6cp01120a1.pdf]

# Chain length, temperature and solvent effects on the structural properties of $\alpha$ -aminoisobutyric acid homooligopeptides

Sonja Grubišić,<sup>a,\*</sup> Balasubramanian Chandramouli,<sup>b</sup> Vincenzo Barone,<sup>b,c</sup> and Giuseppe  
Brancato,<sup>b,c,\*</sup>

<sup>a</sup> Center for Chemistry, IHTM, University of Belgrade, Njegoševa 12, P.O. Box 815, 11001  
Belgrade, Serbia

<sup>b</sup> Scuola Normale Superiore, piazza dei Cavalieri 7, I-56126 Pisa, Italy.

<sup>c</sup> Istituto Nazionale di Fisica Nucleare, Largo Pontecorvo 3, I-56100 Pisa, Italy

Corresponding authors:

E-mail: grubisic@chem.bg.ac.rs

E-mail: giuseppe.brancato@sns.it

## Content

**Table S1.** Averaged intramolecular hydrogen bonds<sup>a</sup> (in Å) as issuing from MD simulations of Aib homopeptides.

| helix                       | solvent | H1   | H2   | H3   | H4   | H5   | H6   | H7   | H8   | H9   |
|-----------------------------|---------|------|------|------|------|------|------|------|------|------|
| Ac-(Aib) <sub>10</sub> -NMe |         |      |      |      |      |      |      |      |      |      |
| 3 <sub>10</sub>             | water   | 3.25 | 3.27 | 3.27 | 2.29 | 3.29 | 3.27 | 3.28 | 3.27 | 3.19 |
| α                           | water   | 3.15 | 3.25 | 3.25 | 3.25 | 3.25 | 3.25 | 3.25 | 3.25 |      |
| Ac-(Aib) <sub>7</sub> -NMe  |         |      |      |      |      |      |      |      |      |      |
| 3 <sub>10</sub>             | water   | 3.27 | 3.26 | 3.24 | 3.27 | 3.20 | 3.28 |      |      |      |
| α                           | water   | 3.25 | 3.24 | 3.25 | 3.10 | 3.25 |      |      |      |      |
| Ac-(Aib) <sub>7</sub> -NMe  |         |      |      |      |      |      |      |      |      |      |
| 3 <sub>10</sub>             | DMSO    | 3.20 | 3.23 | 3.23 | 3.21 | 3.15 | 3.23 |      |      |      |
| α                           | DMSO    | 3.22 | 3.20 | 3.23 | 3.11 | 3.22 |      |      |      |      |
| Ac-(Aib) <sub>6</sub> -NMe  |         |      |      |      |      |      |      |      |      |      |
| 3 <sub>10</sub>             | water   | 3.26 | 3.27 | 3.27 | 3.27 | 3.27 |      |      |      |      |
| α                           | water   | 3.16 | 3.24 | 3.25 | 2.92 |      |      |      |      |      |
| Ac-(Aib) <sub>5</sub> -NMe  |         |      |      |      |      |      |      |      |      |      |
| 3 <sub>10</sub>             | water   | 3.35 | 3.39 | 3.37 | 3.31 |      |      |      |      |      |
| α                           | water   | 3.11 | 3.15 | 2.91 |      |      |      |      |      |      |

<sup>a</sup> Distances are between the donor nitrogen and the acceptor oxygen (N...O)

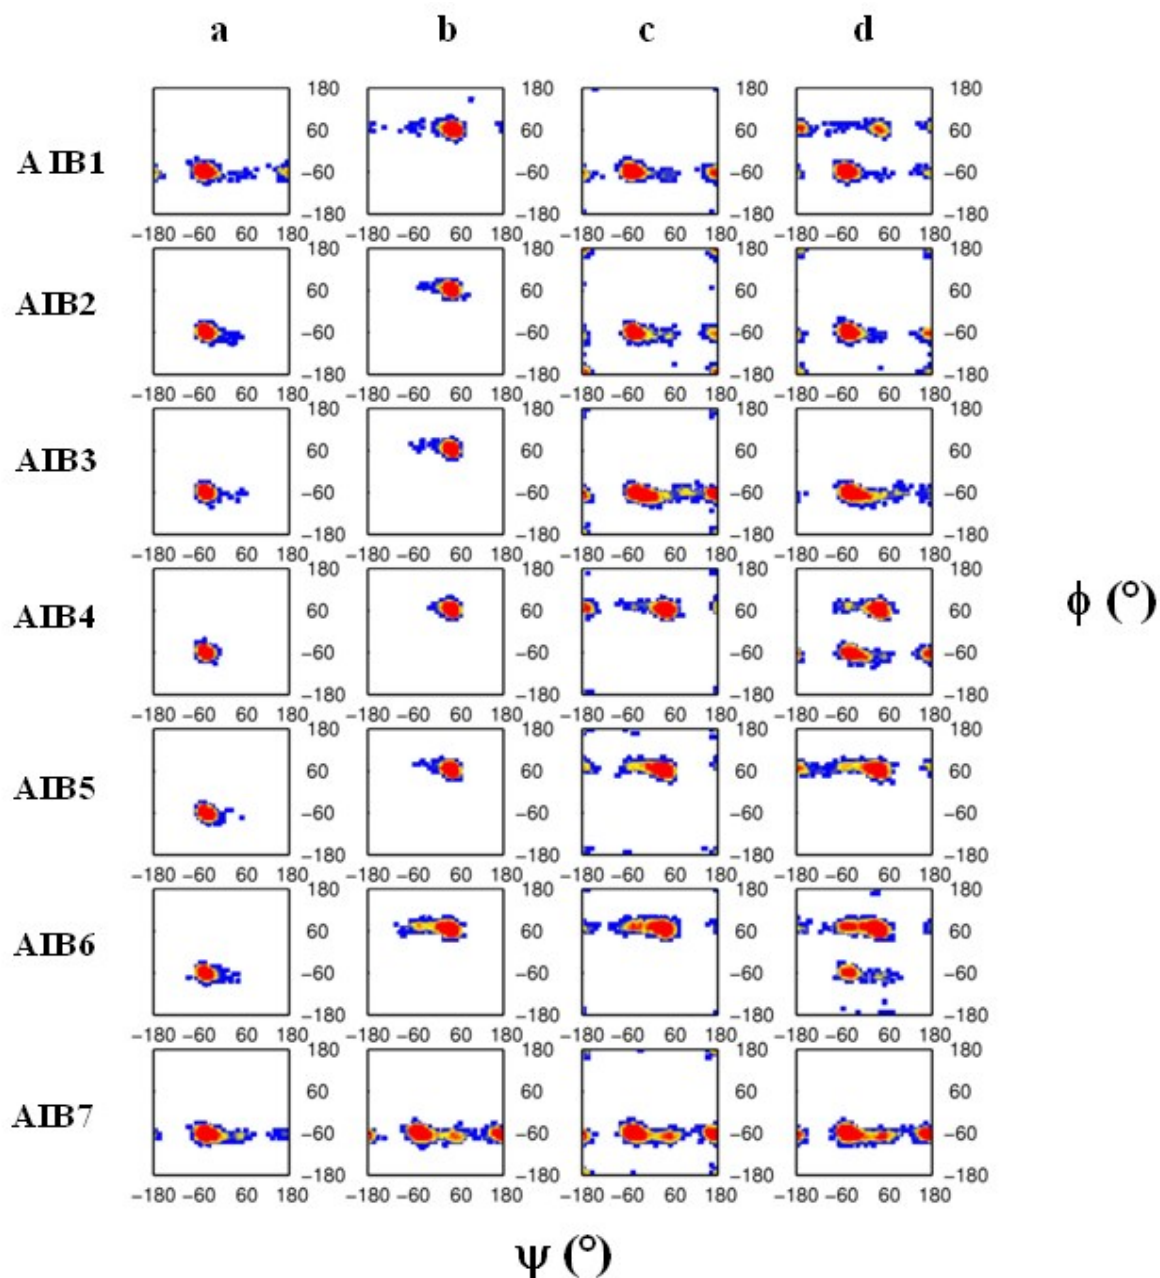

**Figure S1.** Ramachandran plots of all residues (from base up) for the 1-100ns simulations at 300 K with four different initial configurations: (a) random coil, (b) right-handed  $\alpha$ -helix, (c) fully-extended conformation and (d) right-handed semi-extended conformation. Red and blue regions correspond to the highest and lowest population density, respectively.

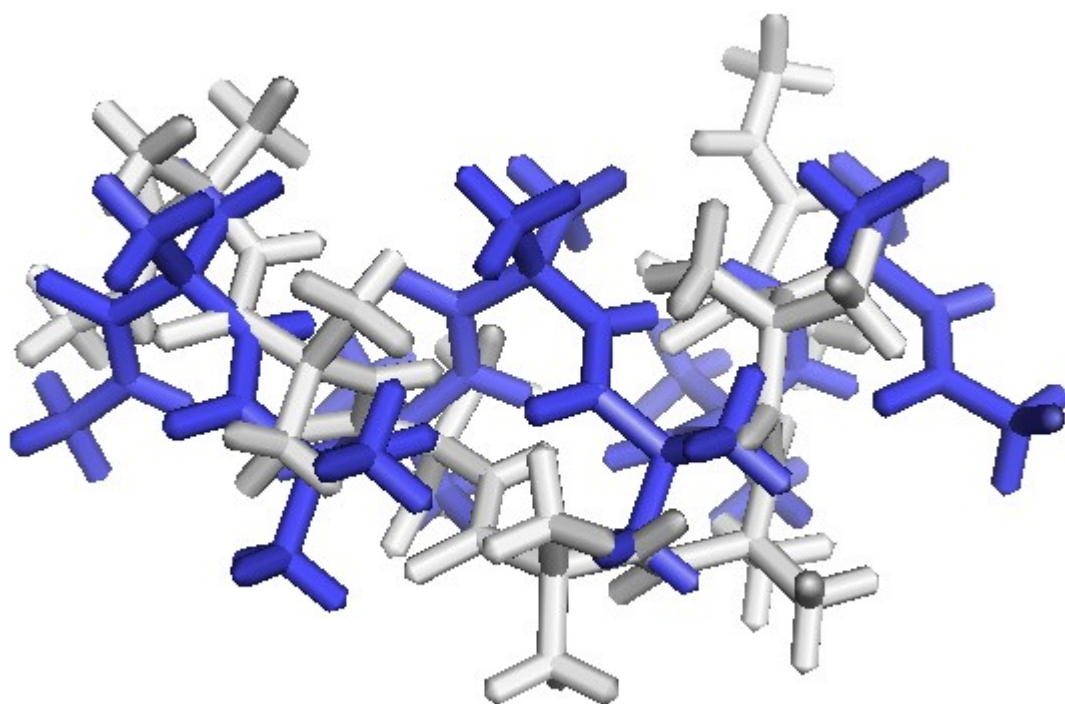

**Figure S2.** Superposition of the initial 3<sub>10</sub> structure (blue) and the representative unfolded structure (grey) taken at 60 ns of the 400 K MD simulation in water.

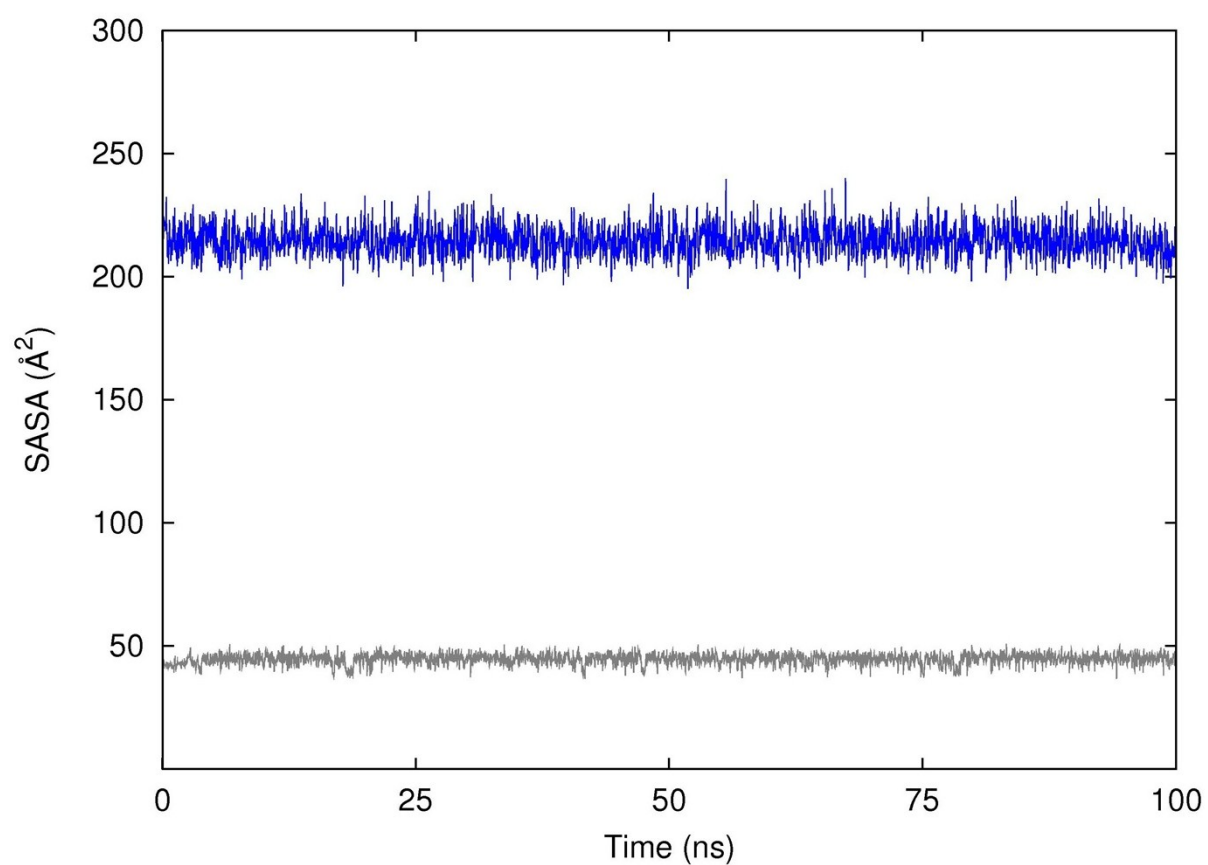

**Figure S3.** Solvent accessible surface areas (SASA's) of the Aib heptapeptide as issuing from the MD simulation at room temperature (grey line, water; blue line, DMSO).

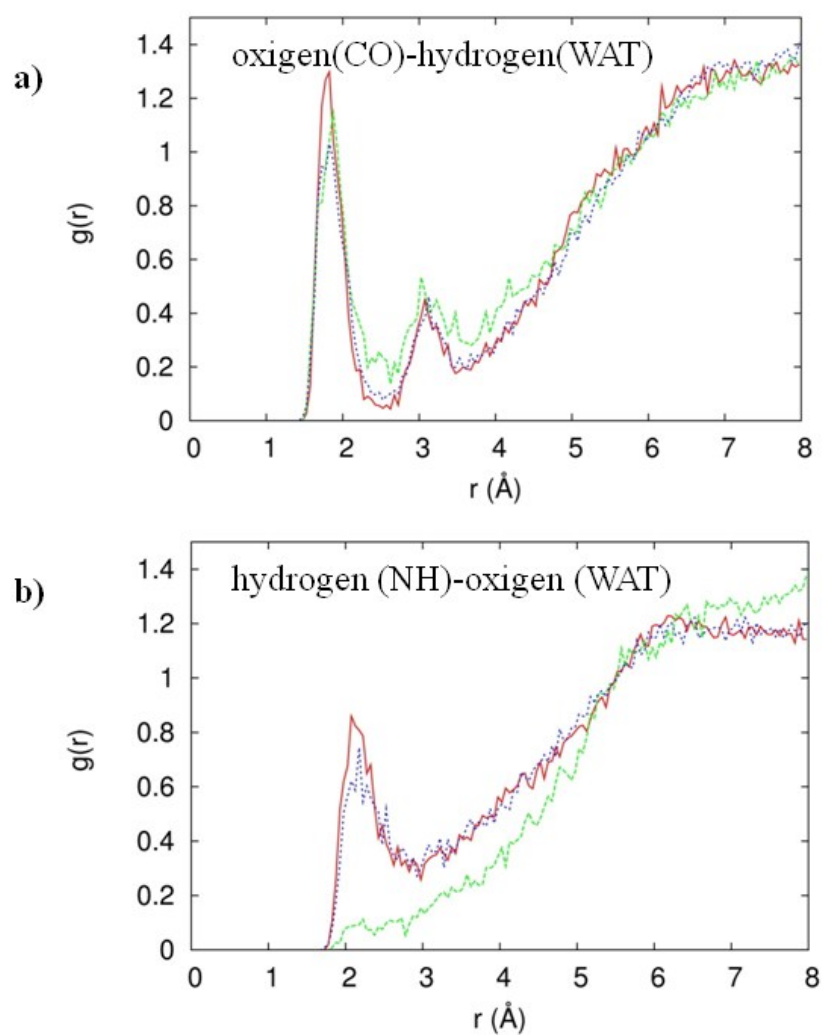

**Figure S4.** Radial distribution functions of the hydrogen and oxygen atoms of water around the selected CO (a) and NH (b) groups of the Aib heptapeptide as issuing from the 1-100ns MD simulation at 300 K (red curves), 350 K (blue curves) and 400 K (green curves) .

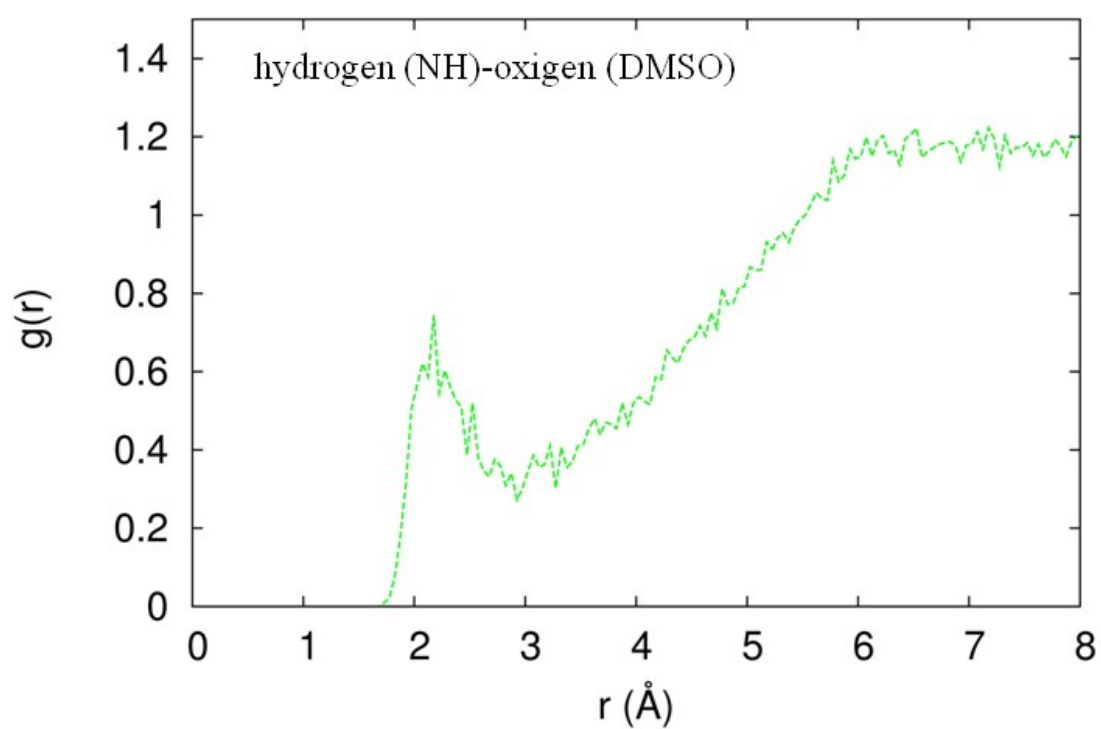

**Figure S5.** Radial distribution function of the oxygen atom of DMSO around the selected NH group of the Aib heptapeptide as issuing from the 1-100ns MD simulation at 300 K.
